# Supplementary material for: The Physical Mechanism of Linear and Nonlinear Optical Properties of Nanographene-Induced Chiral Inversion
Source: MDPI journal article supplement (doi:10.3390/molecules29051053), 2024-02-28
Supplement: s1 [file s1]

## Supporting information

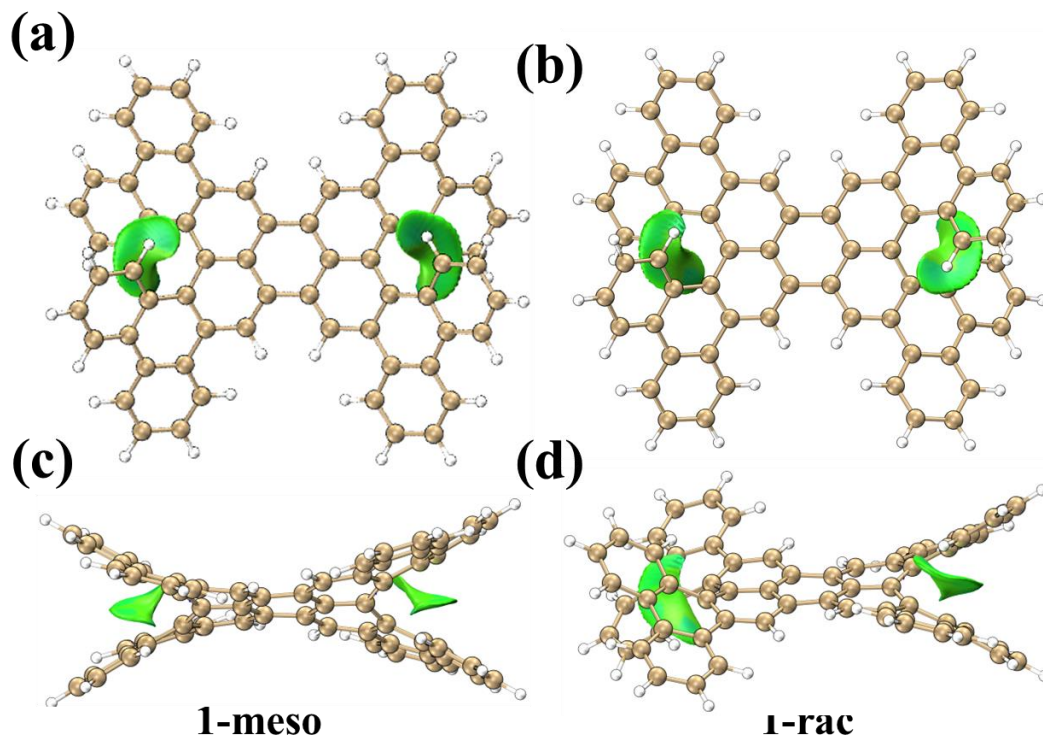

Figure S1. IGMH isosurfaces of 1-meso and 1-rac (a, b), and their side views (c, d).

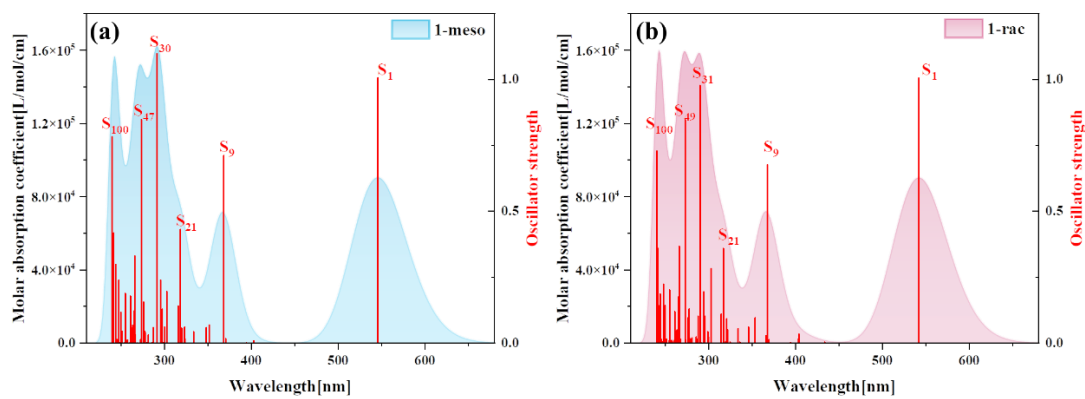

Figure S2. UV-vis spectra of 1-meso (a) and 1-rac (b).

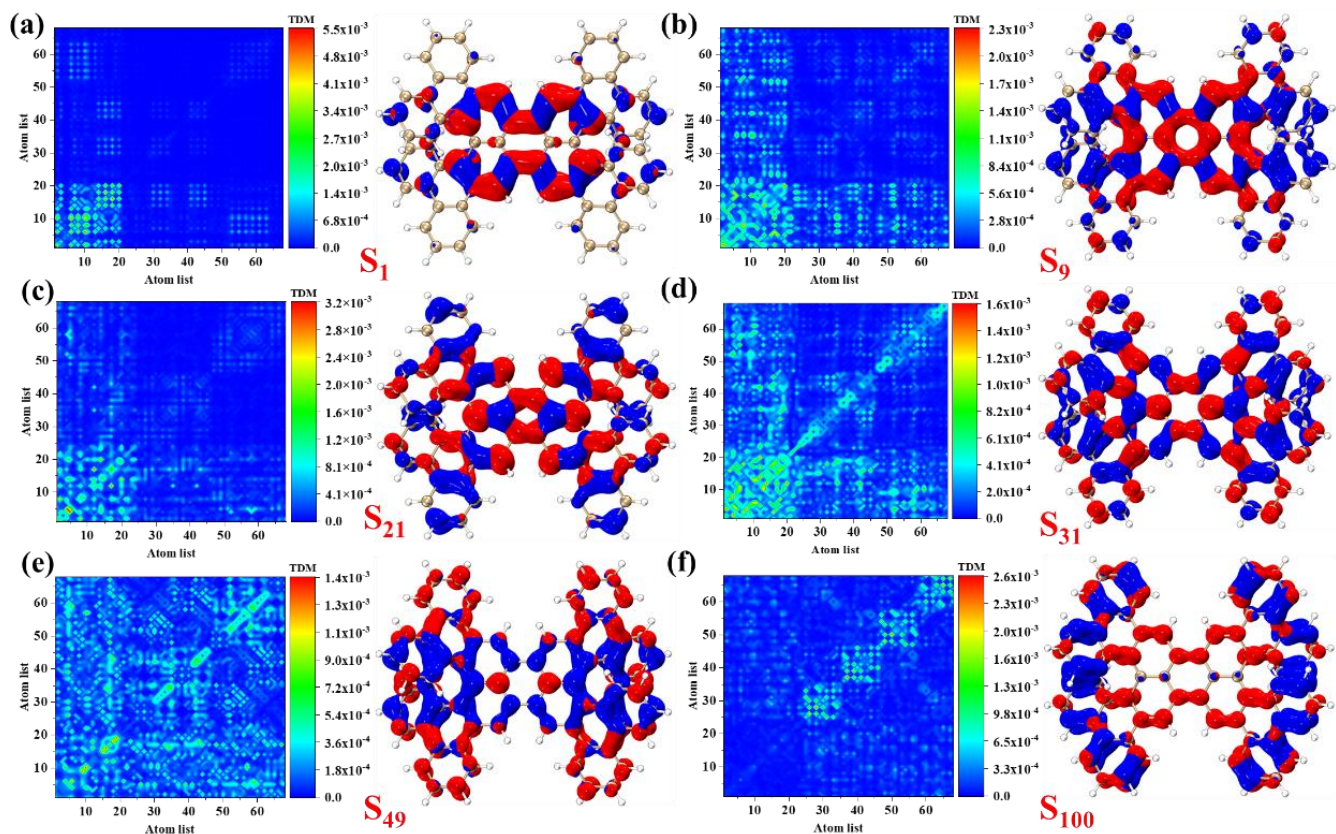

**Figure S3.** TDM and CDD diagrams of 1-rac under  $S_1$  (a),  $S_9$  (b),  $S_{21}$  (c),  $S_{31}$  (d),  $S_{49}$  (e),  $S_{100}$  (f). In CDD diagram, blue represents holes and red represents electrons. The isovalue is 0.0005.

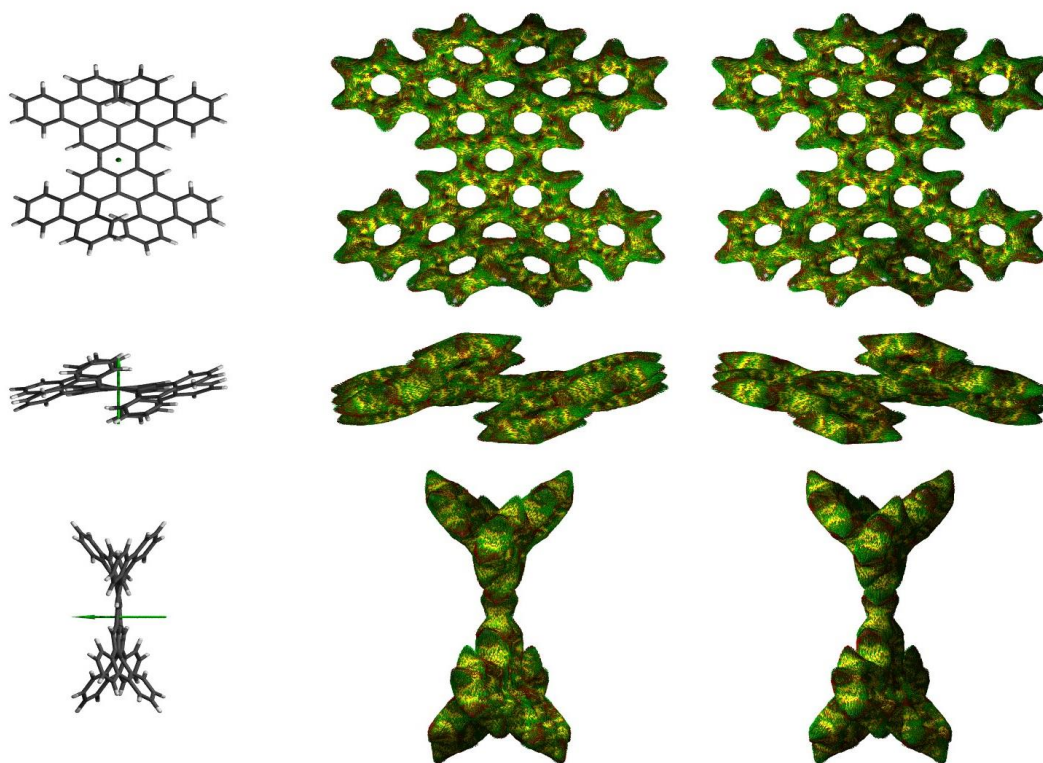

**Figure S4.** Magnetic induced current density of 1-meso.



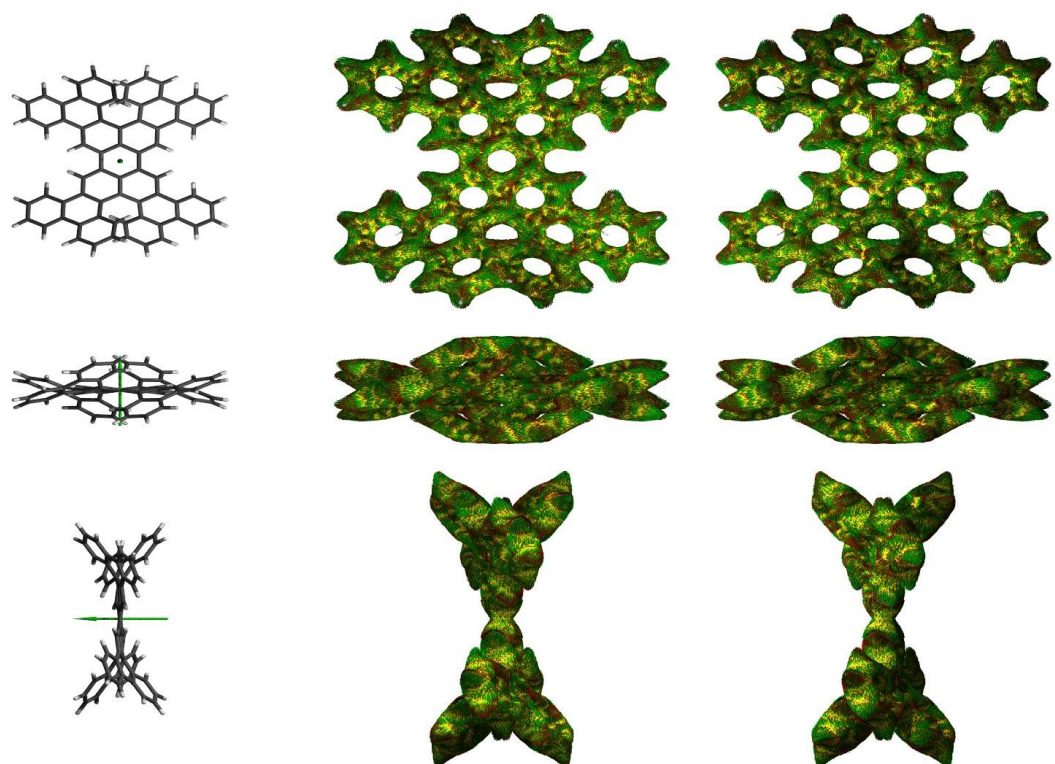

Figure S5. Magnetic induced current density of 1-rac.

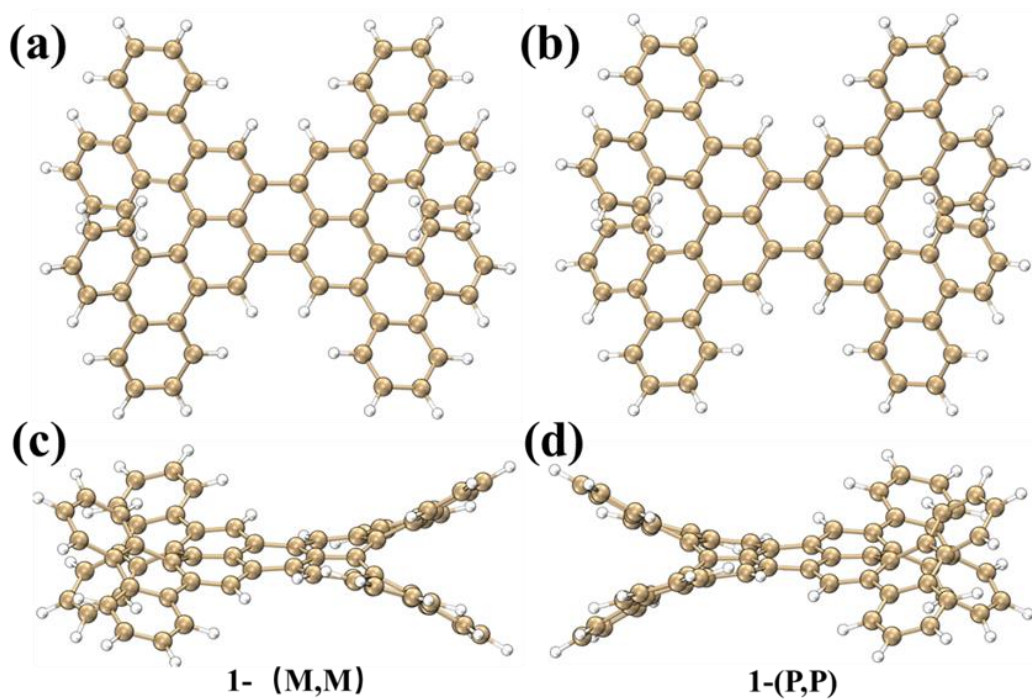

Figure S6. Structure diagram of 1- (M, M) and 1- (P, P).

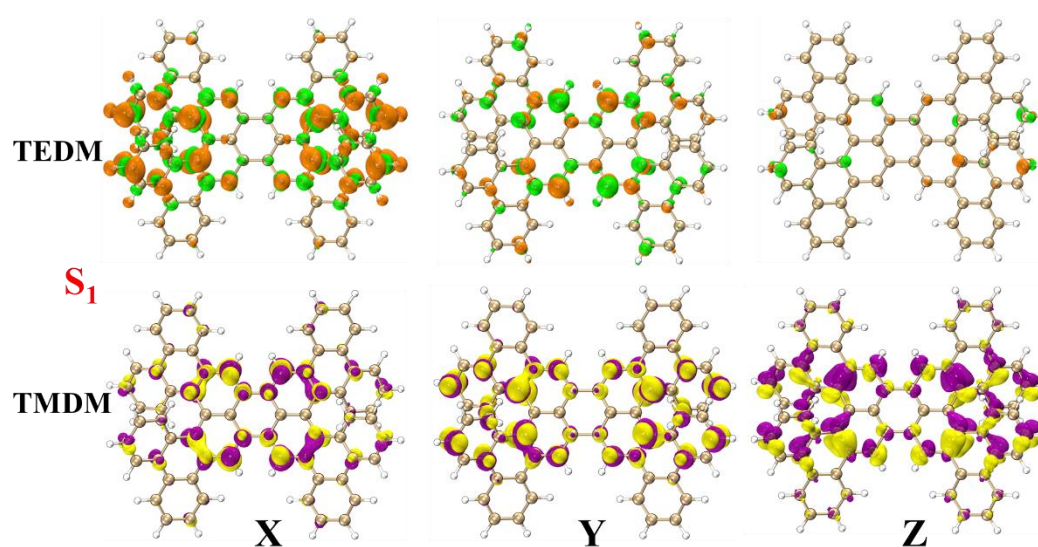

Figure S7. TEDM and TMDM of 1-meso in  $S_1$  excited state.

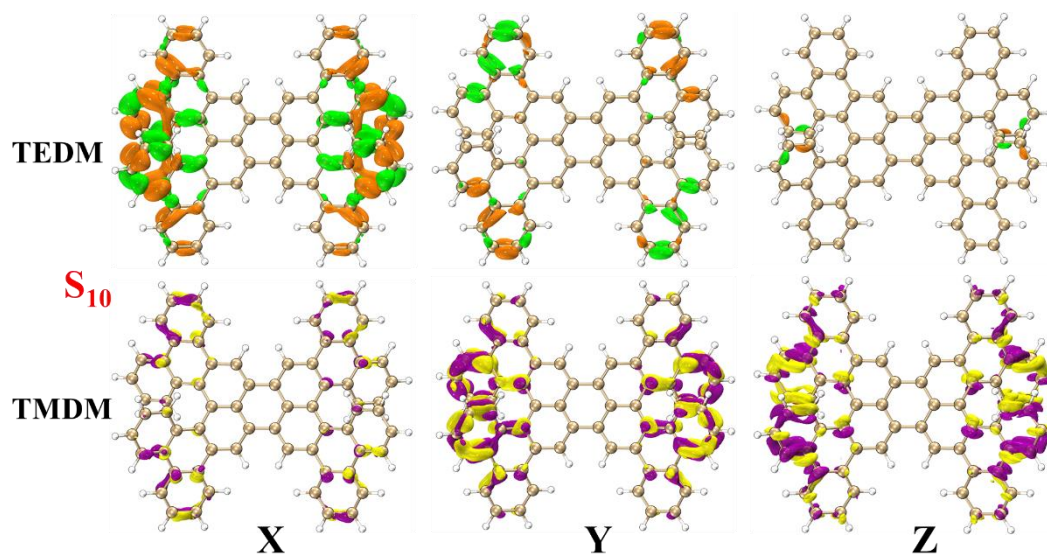

Figure S8. TEDM and TMDM of 1-meso in  $S_{10}$  excited state.

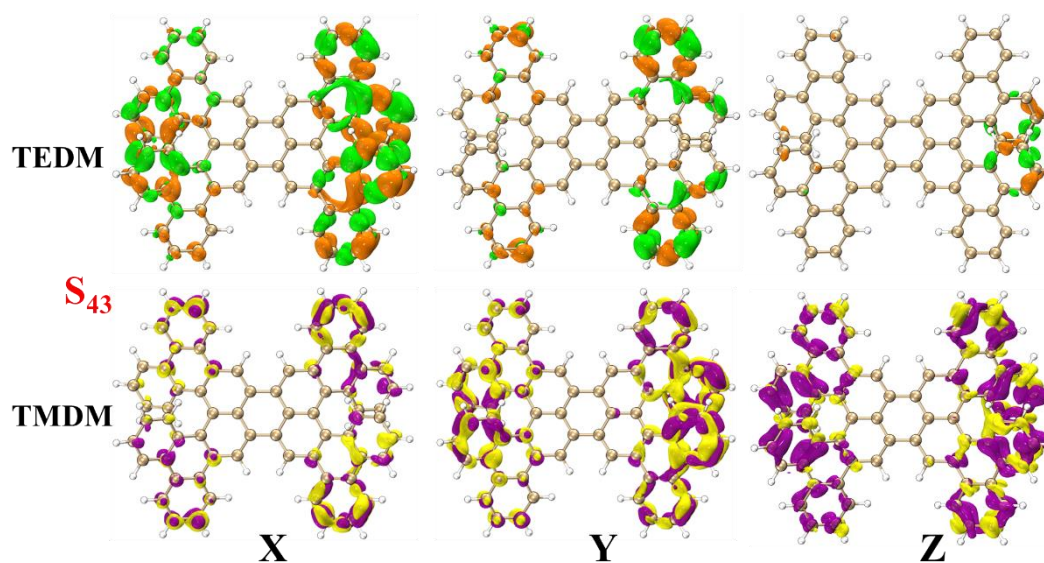

Figure S9. TEDM and TMDM of 1-meso in  $S_{43}$  excited state.



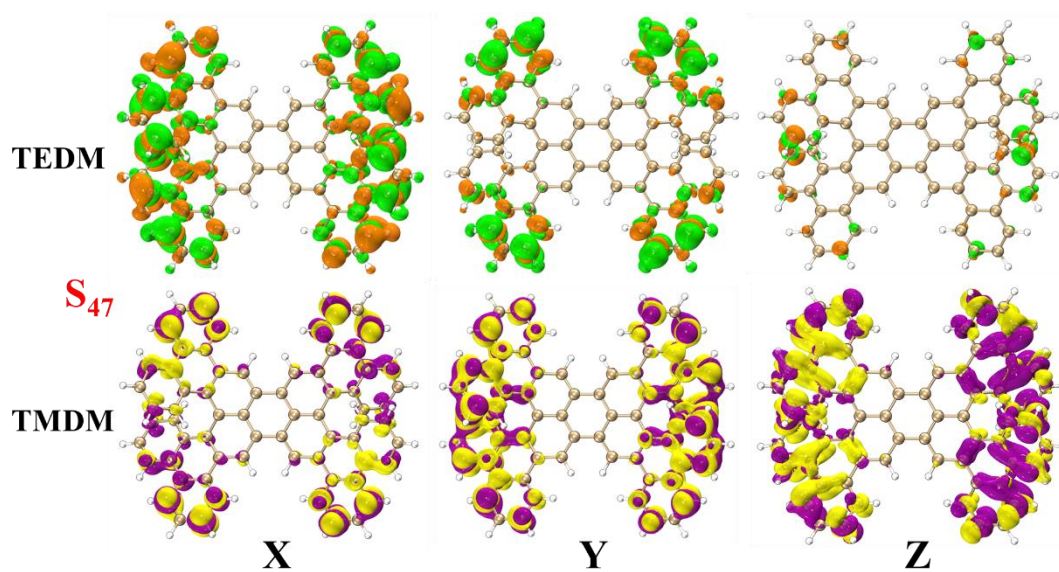

Figure S10. TEDM and TMDM of 1-meso in  $S_{47}$  excited state.

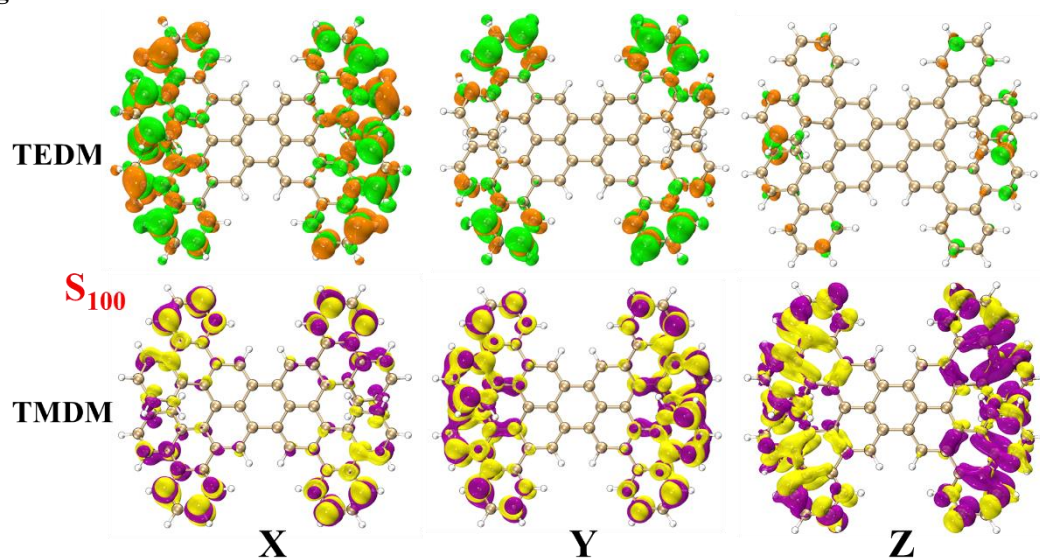

Figure S11. TEDM and TMDM of 1-meso in  $S_{100}$  excited state.

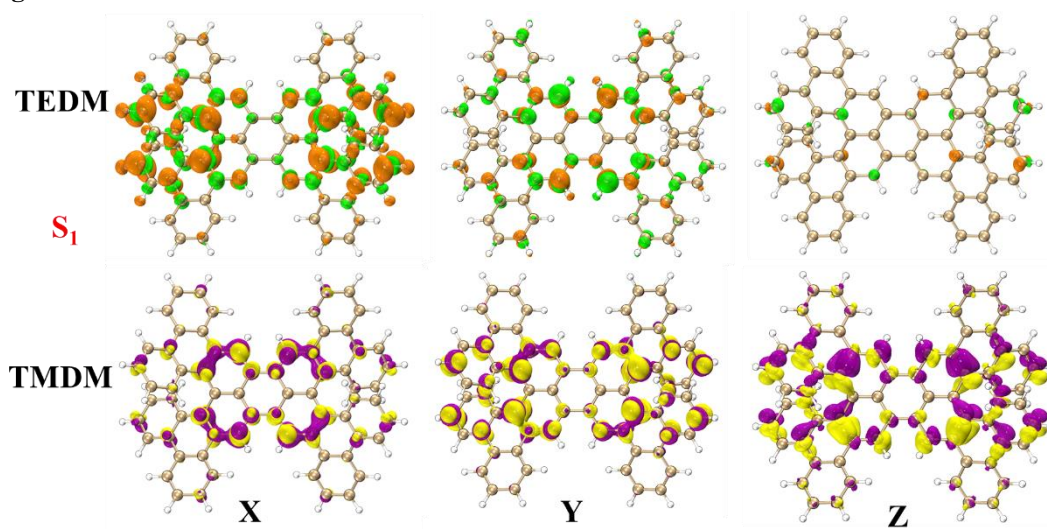

Figure S12. TEDM and TMDM of 1- (P, P) in  $S_1$  excited state.

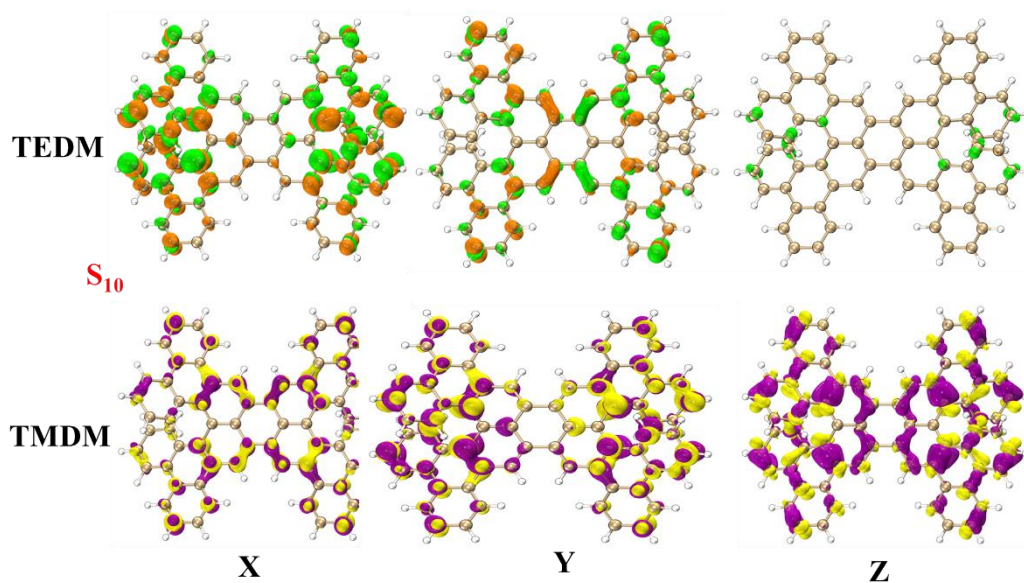

Figure S13. TEDM and TMDM of 1- (P, P) in  $S_{10}$  excited state.

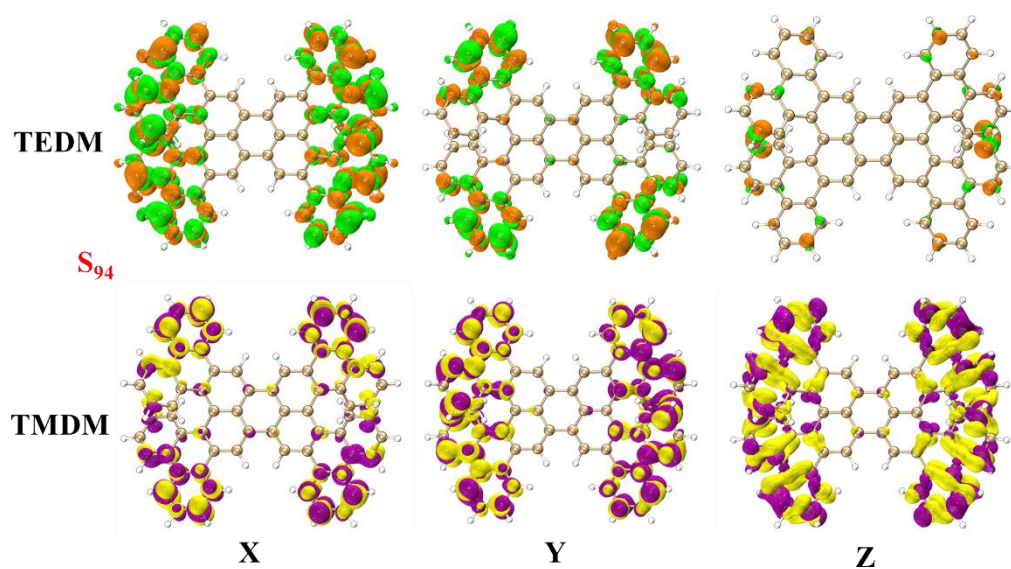

Figure S14. TEDM and TMDM of 1- (P, P) in  $S_{94}$  excited state.

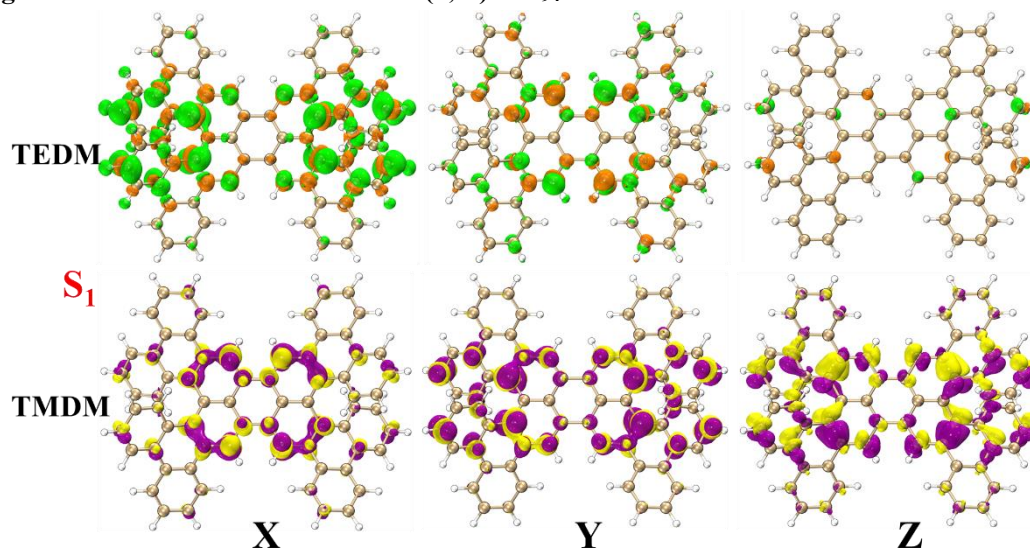

Figure S15. TEDM and TMDM of 1- (M, M) in  $S_1$  excited state.



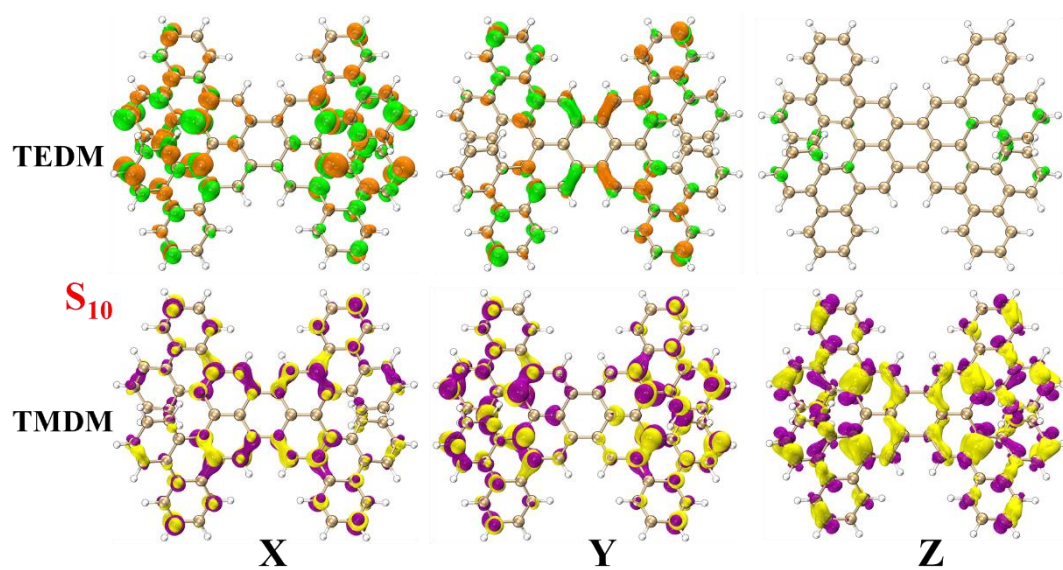

Figure S16. TEDM and TMDM of 1- (M, M) in  $S_{10}$  excited state.

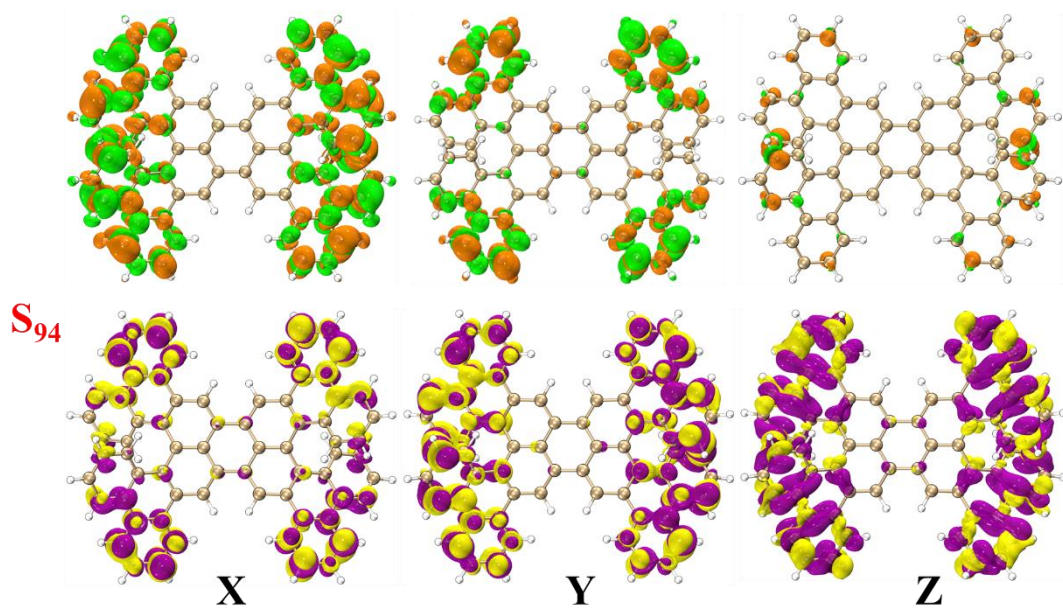

Figure S17. TEDM and TMDM of 1- (M, M) in  $S_{94}$  excited state.
